# Collagen I weakly interacts with the $\beta$ -sheets of $\beta_2$ -microglobulin and enhances conformational exchange to induce amyloid formation

Cody L. Hoop<sup>1</sup>, Jie Zhu<sup>1</sup>, Shibani Bhattacharya<sup>2</sup>, Caitlyn A. Tobita<sup>1</sup>, Sheena E. Radford<sup>\*,3</sup>, Jean Baum<sup>\*,1</sup>

<sup>1</sup>Department of Chemistry and Chemical Biology, Rutgers University, Piscataway, New Jersey 08854, USA; <sup>2</sup>New York Structural Biology Center, New York, New York 10027, USA; and <sup>3</sup>Astbury Centre for Structural Molecular Biology and School of Molecular and Cellular Biology, Faculty of Biological Sciences, University of Leeds, Leeds LS2 9JT, UK

**ABSTRACT:** Amyloidogenesis is significant in both protein function and pathology. Amyloid formation of folded, globular proteins is commonly initiated by partial unfolding. However, how this unfolding event is triggered for proteins that are otherwise stable in their native environments is not well understood. The accumulation of the immunoglobulin protein  $\beta_2$ -microglobulin ( $\beta_2m$ ) into amyloid plaques in the joints of long-term hemodialysis patients is the hallmark of Dialysis Related Amyloidosis (DRA). While  $\beta_2m$  does not form amyloid unassisted near neutral pH *in vitro*, the localization of  $\beta_2m$  deposits to joint spaces suggests a role for the local extracellular matrix (ECM) proteins, specifically collagens, in promoting amyloid formation. Indeed, collagen and other ECM components have been observed to facilitate  $\beta_2m$  amyloid formation, but the large size and anisotropy of the complex, combined with the low affinity of these interactions, has limited atomic-level elucidation of the amyloid-promoting mechanism by these molecules. Using solution NMR approaches that uniquely probe weak interactions and large complexes, we are able to derive binding interfaces for collagen I on  $\beta_2m$  and detect collagen I-induced  $\mu$ -ms timescale dynamics in the  $\beta_2m$  backbone. By combining solution NMR relaxation methods and <sup>15</sup>N-dark state exchange saturation transfer experiments, we propose a model in which weak, multimodal collagen I– $\beta_2m$  interactions promote exchange with a minor population of an amyloid-competent species to induce fibrillogenesis. The results portray the intimate role of the environment in switching an innocuous protein into an amyloid-competent state, rationalizing the localization of amyloid deposits in DRA.

## INTRODUCTION

Several proteins self-associate into amyloid fibrils, which in some cases have functional roles<sup>1-3</sup>, but for others are associated with debilitating human diseases<sup>4-6</sup> including Alzheimer's Disease, Parkinson's Disease, Huntington's Disease, type II diabetes, cataracts, and Dialysis Related Amyloidosis (DRA). The protein precursors of amyloid diseases have unrelated primary sequences and structures<sup>7</sup>, spanning natively unfolded (intrinsically disordered) states, such as  $\alpha$ -synuclein, amyloid- $\beta$  peptide, and tau<sup>8-10</sup>, to stable, globular proteins, such as  $\beta_2$ -microglobulin ( $\beta_2m$ ), transthyretin, and immunoglobulin light chains<sup>11-15</sup>. Initiation of amyloid formation of the latter class of proteins requires unfolding or partial unfolding of monomeric precursors, which can transiently assume amyloid-competent state(s). This kinetic barrier may be lower for intrinsically disordered proteins. However, what triggers the initial unfolding and subsequent amyloidogenesis of natively folded globular proteins remains poorly understood.

Accumulation of  $\beta_2m$  amyloid plaques in the joints of long-term hemodialysis patients leads to DRA and arthritic symptoms<sup>14-17</sup>. In healthy individuals,  $\beta_2m$  dissociates from the major histocompatibility complex-I (MHC-I), is released into the plasma, and is carried to the kidneys for degradation<sup>18-19</sup>. However, when hemodialysis or peritoneal dialysis are required due to kidney failure,  $\beta_2m$  is not efficiently removed from the plasma, leading to increased concentrations by up to 60-fold<sup>16, 20-21</sup>. Remarkably, despite being transported throughout the body,  $\beta_2m$  accumulates into amyloid plaques specifically in skeletal tissues of dialysis patients<sup>16, 21-24</sup>. The mechanism(s) by which  $\beta_2m$  fibrillizes *in vivo* is not well understood, since in isolation the wild-type protein (the major culprit of DRA) resists amyloid formation in physiological conditions, even at high (100  $\mu$ M) concentrations<sup>25-26</sup>. It has been proposed that  $\beta_2m$  amyloid localized in the joints could result, at least in part, from interactions with the major components of the extracellular matrix (ECM) in bone and cartilage: collagens I and II<sup>20-23</sup> and glycosaminoglycans (GAGs)<sup>27-29</sup>. The binding affinities of  $\beta_2m$  to these collagens have been shown to be in the  $\mu$ M–mM range<sup>30</sup> with preference for collagen I<sup>27</sup>. Although the interaction is weak, it is nonetheless pathologically significant, as images of *ex vivo* DRA plaques reveal  $\beta_2m$  amyloid covering the surface of collagen I fibrils<sup>21</sup>. Indeed, recent kinetics studies have revealed that ECM components, such as collagens<sup>21, 28-29</sup> and GAGs<sup>28-29, 31-32</sup>, as well as pre-formed fibril seeds and other co-factors<sup>25-26, 28, 31-49</sup>, induce and modulate  $\beta_2m$  amyloid formation. However, atomic details of how these components interact with, and induce, the amyloid formation of  $\beta_2m$  have remained an open question.

The weak nature of the interaction and large, anisotropic shape of the  $\beta_2m$ –collagen I complex create a challenge for deriving atomic-level information on how collagen I– $\beta_2m$  interactions initiate  $\beta_2m$  amyloidogenesis. The immunoglobulin fold of monomeric  $\beta_2m$  has dimensions of  $\sim$  4 nm x 2 nm x 2 nm, whereas the simplest triple helical unit of collagen I has strikingly larger dimensions of 300 nm x 1.5 nm x 1.5 nm.

Collagen I triple helices assemble into even larger, structured fibrils that have diameters ranging from 10–500 nm and lengths on the  $\mu$ -scale. Collagen I therefore presents as a large surface with numerous reactive groups for  $\beta_2$ m interactions. These challenges are not insurmountable, however, as powerful solution nuclear magnetic resonance (NMR) spectroscopy methods can indirectly probe large, lowly populated complexes in site-specific detail that are invisible by other biophysical techniques.

In this study, by utilizing NMR spectroscopy experiments designed to probe large complexes, we are able to pinpoint the binding interface of wild-type  $\beta_2$ m for collagen I at physiological pH and have shown it to involve both  $\beta$ -sheets of the native protein, suggestive of different binding modes for the same molecular complex. Residues identified at the binding interface include both hydrophobic and hydrophilic sidechains. Through  $^{15}\text{N}$  relaxation experiments, we have also found that collagen I increases the number of residues in  $\beta_2$ m involved in conformational exchange on the  $\mu$ s–ms timescale. These regions include residues 6–11 ( $\beta$ -strand A), 36–39 ( $\beta$ -strand C), 51 ( $\beta$ -strand D), and 91–94 ( $\beta$ -strand G) in the edge  $\beta$ -strands and loop residues 15–20 (loop AB), 35 (loop BC), 52–53 (loop DE), 63 (loop DE), and 78 (loop EF), the dynamics and conformations of which are known to be important for  $\beta_2$ m amyloid formation<sup>31, 38, 50–51</sup>. We propose that the weak interactions of collagen I with the  $\beta_2$ m  $\beta$ -sheets promote exchange of the native protein with a minor population of amyloid-competent species that induce fibrillogenesis. This study illuminates how a protein component, collagen I, local to the environment in which  $\beta_2$ m plaques are found, can interact with a stable, globular protein to initiate debilitating amyloid formation.

## RESULTS

### Collagen I induces $\beta_2$ m amyloid formation in a concentration-dependent manner.

Since the direct interaction of  $\beta_2$ m with collagen in the joint space has been proposed to induce  $\beta_2$ m amyloid formation<sup>21, 27</sup>, we probed the  $\beta_2$ m–collagen I interaction under physiological pH conditions (pH 7.4) using a solid-phase enzyme-linked immunosorbent assays (ELISA) (Figure 1A). Importantly, the results suggest a dose-dependent interaction of the two proteins, consistent with previously published results<sup>27</sup>, under the conditions employed here. The adhesion of  $\beta_2$ m to casein was monitored as a negative control, for which no significant binding was observed (Figure 1A).

Having verified the  $\beta_2$ m–collagen I interaction under physiological pH conditions, we next monitored amyloid growth of  $\beta_2$ m in the presence or absence of collagen I by thioflavin T (ThT) fluorescence (Figure 1B). In the presence of 3.4 mg/ml collagen I (1:0.1 molar ratio  $\beta_2$ m:collagen I),  $\beta_2$ m amyloid is formed within 12–21 days (Figure 1B, blue), as evident by enhanced ThT fluorescence. This is not observed in the absence of collagen I in the same conditions, and collagen I alone does not show ThT fluorescence enhancement (Figure 1B). Notably, at lower concentrations of collagen I, lower  $\beta_2$ m concentrations, or shorter timescales fibrils are not observed<sup>29, 31</sup>. Atomic force microscopy (AFM) images also show that  $\beta_2$ m interacts with collagen I fibrils, with  $\beta_2$ m coating the collagen I fibril surface before detectable fibril formation by ThT fluorescence, obscuring the characteristic collagen I fibril D-banding that is clearly observed in the absence of  $\beta_2$ m (Figure 1C,D), consistent with previous results<sup>21</sup>.  $\beta_2$ m alone (Figure 1E) does not aggregate in the conditions employed, with no fibrils or high molecular weight assemblies observed by AFM. These data confirm that adhesion of collagen I to  $\beta_2$ m induces  $\beta_2$ m amyloid formation under physiological conditions *in vitro*, while the protein is not able to form amyloid in the absence of collagen I.

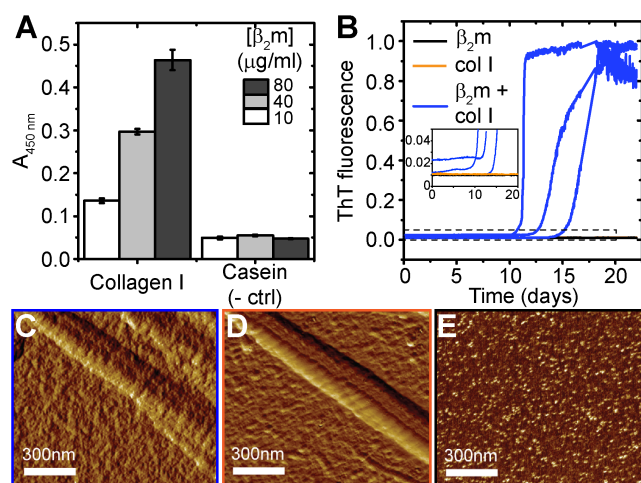

**Figure 1. Detection of collagen I-driven  $\beta_2$ m amyloid formation.** (A) ELISA probing dose-dependent adhesion of  $\beta_2$ m (10–80  $\mu\text{g/ml}$ ) to collagen I (10  $\mu\text{g/ml}$ ) or casein (10  $\mu\text{g/ml}$ , used as a negative control), at pH 7.4. The average absorbance at 450 nm from triplicates within the same plate are reported with the standard deviation given as error bars. (B) ThT fluorescence curves of 85  $\mu\text{M}$   $\beta_2$ m (black), 85  $\mu\text{M}$   $\beta_2$ m + 3.4 mg/ml (8.5  $\mu\text{M}$ ) collagen I (blue), or 3.4 mg/ml collagen I alone (orange) over 22 days in 10 mM sodium phosphate buffer, pH 7.4, shaking at 600 rpm at 37°C. Three representative curves are given for each condition. The insert shows a zoom-in of the baseline of the ThT fluorescence curves to highlight the lack of fluorescence enhancement for both  $\beta_2$ m (black) and collagen I (orange). (C–E) Representative amplitude-modulated AFM images of (C)  $\beta_2$ m co-incubated with collagen I fibrils, (D) collagen I fibrils alone, and (E)  $\beta_2$ m alone after incubating for four days at 37°C with shaking.

Weak, but specific  $\beta_2$ m–collagen I interactions observed through  $^{15}\text{N}$ -R<sub>2</sub> perturbations.

In order to understand mechanistic details by which collagen I interacts with  $\beta_2m$  to initiate amyloid formation, we used solution NMR methods, which provide an excellent toolbox of approaches able to characterize residue-specific features of weak protein–protein interactions on multiple timescales<sup>52–55</sup>. A titration of collagen I into a  $\beta_2m$  monomer solution showed no significant chemical shift perturbations in  $^1H$ – $^{15}N$  heteronuclear single quantum correlation (HSQC) spectra (Figure S1). However, a residue-specific attrition of the peak intensities observed with increasing collagen I concentrations (Figure 2A), suggests chemical exchange between the bound and free states of  $\beta_2m$  consistent with the low affinity of the interaction in these conditions ( $K_d \approx 410 \mu M^{30}$ ). To minimize collagen I aggregation during the NMR experiments and to capture the most specific interactions, we proceeded with low collagen I concentrations (0.6–1.2 mg/ml) that displayed consistent residue-specific perturbations and kept samples at 10°C, allowing NMR spectra to be acquired for over one week without visible alterations in spectral quality. Addition of 1.2 mg/ml collagen I to 300  $\mu M$   $\beta_2m$  resulted in a reduction in resonance intensity of all peaks, consistent with transient formation of a high molecular weight complex (Figure 2A). However, the greatest reduction in peak intensities occurred for residues in the eight  $\beta$ -strands of the wild-type protein (Figure 2A). These peak intensity losses are in part due to increased  $^{15}N$ -transverse relaxation rates ( $R_2$ ), which are sensitive to changes in internal motions on the ps–ns timescale and conformational exchange on the  $\mu s$ –ms timescale. Indeed, at these concentrations, we observe an overall increase in  $^{15}N$ - $R_2$ , but importantly, the increase is not uniform across all residues, but is residue specific, involving predominantly residues 2–3 (N-terminus), 7–11 ( $\beta$ -strand A), 16–19 (loop AB), 23–26 ( $\beta$ -strand B), 35–39 ( $\beta$ -strand C), 50–52 ( $\beta$ -strand D), 64, 66–69 ( $\beta$ -strand E), 79–82 ( $\beta$ -strand F), 85, 87 (loop FG), and 91–94 (C-terminal  $\beta$ -strand G) (Figure 2B–C). The increased  $^{15}N$ - $R_2$  at these specific sites could have multiple origins, arising due to reduced backbone mobility upon direct interaction with collagen I and/or to line broadening due to exchange between species with different chemical shifts, especially since the observed  $^{15}N$ - $\Delta R_2$  is dependent on magnetic field (700 MHz vs. 900 MHz, Fig. S2). In order to disentangle these contributions to the increase in  $^{15}N$ - $R_2$ , we proceeded with two sets of NMR experiments:  $^{15}N$ -dark state exchange saturation transfer (DEST) experiments, which can identify residues interacting with the large complex, and in-phase Hahn-echo experiments, which detect conformational exchange on the  $\mu s$ –ms timescale.

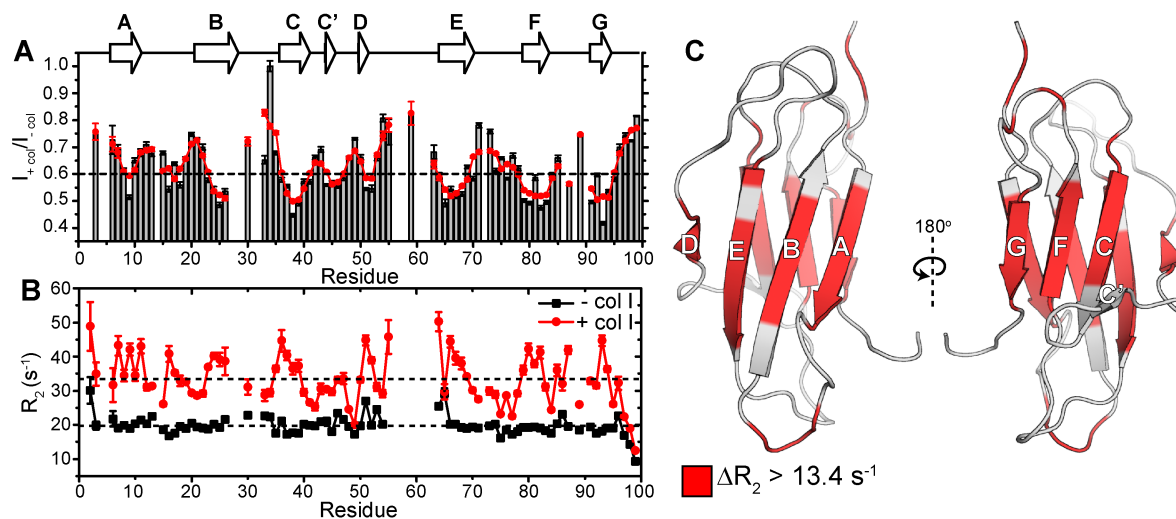

**Figure 2. Characterizing residue-specific  $\beta_2m$ –collagen I binding through  $^{15}N$ - $R_2$  measurements.** (A) Amide backbone signal intensity ratios from  $^1H$ – $^{15}N$  HSQC spectra of 300  $\mu M$   $\beta_2m$  in the presence of 1.2 mg/ml collagen I compared with in the absence of collagen I (gray bars). The red line is a smoothed curve of the signal intensity ratios to help guide the eye. The dashed line is drawn at the average signal intensity ratio over the entire protein. Dips in the signal intensity reflect regions maximally perturbed by the presence of collagen I. Error bars are propagated from the noise level of the spectra. The secondary structure is indicated above the plot. (B)  $^{15}N$ - $R_2$  measurements of 300  $\mu M$   $\beta_2m$  in the presence (red) or absence (black) of 1.2 mg/ml collagen I. The errors are propagated from the fitting errors. The dashed lines indicate the mean  $^{15}N$ - $R_2$  values of  $\beta_2m$  in the presence or absence of 1.2 mg/ml collagen I over the entire protein. All experiments were conducted in TBS, pH 7.4 containing 0.5 mg/ml casein as a non-specific binding blocking agent at 10°C. Note that in these conditions, several residues in the DE loop do not have observable peak intensities in the  $^1H$ – $^{15}N$  HSQC spectrum due to inherent conformational exchange, consistent with previous results<sup>49</sup>. (C) Solution NMR structure of the WT- $\beta_2m$  monomer (PDB: 2XKS<sup>49</sup>) highlighting residues that show an increase in  $^{15}N$ - $R_2$  higher than 13.4  $s^{-1}$  (the mean  $\Delta^{15}N$ - $R_2$ ) upon addition of 1.2 mg/ml collagen I.

### Pinpointing the collagen I interaction interface on $\beta_2m$ through $^{15}N$ -DEST.

In order to determine which residues of  $\beta_2m$  interact most intimately with collagen I, we used  $^{15}N$ -DEST experiments<sup>56–57</sup>. This experiment is optimal when there is a measurable increase in  $R_2$  due to formation of a transient, large complex that is NMR-invisible because of its high  $R_2$  and detects the exchange between an observable ‘light’ state (free monomeric  $\beta_2m$ ) and the NMR-invisible ‘dark’ state (the high molecular weight collagen I– $\beta_2m$  complex). In the DEST experiment, high molecular weight species with high  $R_2$  values, such as the collagen I– $\beta_2m$  complex, can be partially saturated by weak radiofrequency (RF) fields at frequency offsets where monomeric  $\beta_2m$  is not saturated. Saturation transfer to the observable monomeric species by chemical exchange is detected as a loss in monomeric  $\beta_2m$  signal

intensity. The broadening of these DEST saturation profiles (reduced signal intensities at further frequency offsets) in the presence of collagen I, relative to in its absence, is therefore indicative of residues at the interaction interface (Figure 3A–B). The ‘broadness’ of the profiles was measured by calculating the DEST difference ( $\Theta$ ) for each residue, which is a measure of the relative effects of on-resonance and off-resonance  $^{15}\text{N}$  saturation. Using a saturation frequency of 350 Hz, we measured  $\Theta$  as:  $\Theta = \frac{(I_{30\text{kHz}+I-30\text{kHz}}) - (I_{4\text{kHz}+I-4\text{kHz}})}{(I_{30\text{kHz}+I-30\text{kHz}} + I_{4\text{kHz}+I-4\text{kHz}})}$ , where  $\pm 30$  kHz were the most off-resonance  $^{15}\text{N}$  offsets, and  $^{15}\text{N}$  offsets of  $\pm 4$  kHz provide enough saturation transfer from bound to unbound  $\beta_2\text{m}$  to show significant intensity loss without eliminating the signal in most cases. A substantial change in  $\Theta$  ( $\Delta\Theta$ ) upon addition of collagen I is reflective of residues at the binding interface (Figure 3A). Notably, we observe that the broadening of the DEST saturation profiles is residue-specific and not uniform across all  $\beta_2\text{m}$  residues, with some residues showing no change in the DEST difference in the presence of collagen I (Figure 3A–B). Examples of DEST profiles in the presence or absence of collagen I for a residue that shows DEST due to collagen I binding (V82 in  $\beta$ -strand F) and one that does not (K41 in the C–C’ loop) are given in Figure 3B. In Figure 3A, those residues with  $\Delta\Theta$  larger than the mean, and likely have the most direct contacts with the collagen in the  $\beta_2\text{m}$ –collagen I complex (shaded red), include residues 6–11 ( $\beta$ -strand A), 15–20 (loop AB), 21–26 ( $\beta$ -strand B), 35 (loop BC), 36–39 ( $\beta$ -strand C), 51 ( $\beta$ -strand D), 52–53 (loop DE), 63 (loop DE), 64–69 ( $\beta$ -strand E), 78 (loop EF), 79–83 ( $\beta$ -strand F), and 91–94 ( $\beta$ -strand G).

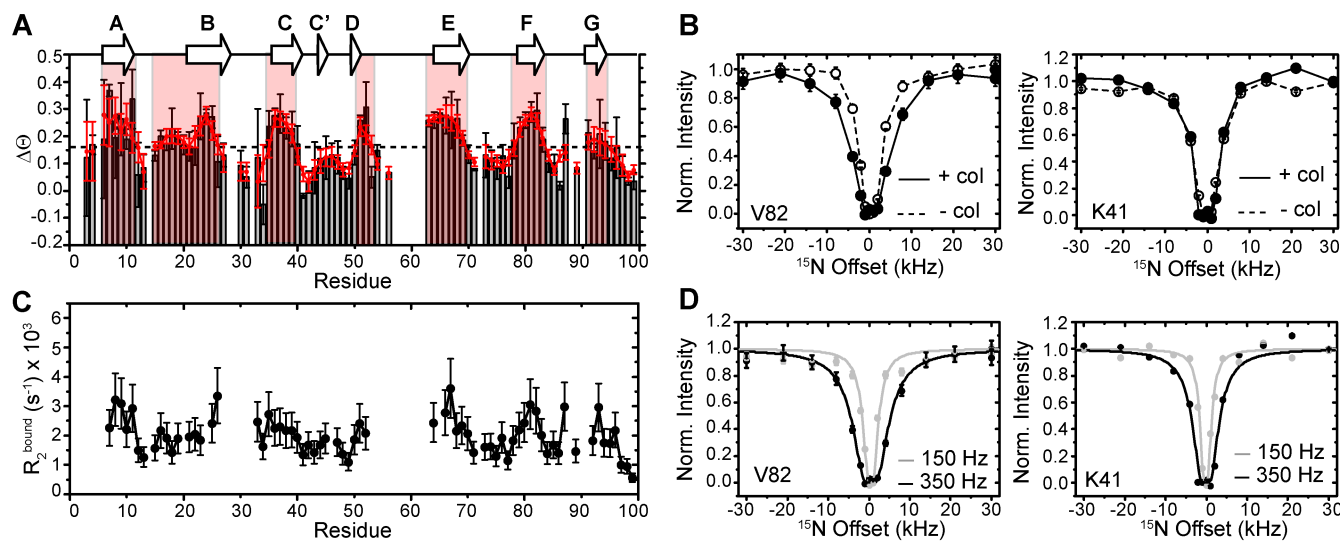

**Figure 3.  $^{15}\text{N}$ -DEST to identify collagen-binding interface on  $^{15}\text{N}$ - $\beta_2\text{m}$ .** (A)  $\Delta\Theta$  calculated from  $^{15}\text{N}$ - $\beta_2\text{m}$  DEST intensities at  $\pm 30$  kHz and  $\pm 4$  kHz  $^{15}\text{N}$  offsets with a 350 Hz saturation frequency in the presence or absence of collagen I (gray bars). The red line is a smoothed curve to guide the eye. The dashed line represents the average value of  $\Delta\Theta$  from all residues. The secondary structure is shown above the plot. (B) Examples of  $^{15}\text{N}$ -DEST profiles of 300  $\mu\text{M}$   $^{15}\text{N}$ - $\beta_2\text{m}$  in the presence (solid line, solid circles) or absence (dashed line, open circles) of 0.6 mg/ml collagen I. V82 in  $\beta$ -strand F shows enhancement of the DEST effect upon addition of collagen, whereas K41 in the CC’ loop does not. (C)  $^{15}\text{N}$ - $R_2^{\text{bound}}$  for each residue determined from fitting  $^{15}\text{N}$ -DEST profiles to the McConnell equations. (D) Examples of fit DEST profiles using the same residues as in (B). Data points are shown as circles and the fits as solid lines (gray- 150 Hz saturation, black- 350 Hz saturation). All experiments were carried out in TBS, pH 7.4, 10°C at 700 MHz  $^1\text{H}$  Larmor frequency.

In addition, the full DEST profiles can be used to quantify residue-specific transverse relaxation values of  $\beta_2\text{m}$  in the collagen I-bound state ( $R_2^{\text{bound}}$ ) and exchange kinetics between the bound and unbound  $\beta_2\text{m}$ . Since the  $\Delta R_2$  may be due to more complex processes than collagen I binding alone, such as an overall increased viscosity due to the presence of the large collagen I molecules, we fit only the  $^{15}\text{N}$  DEST profiles of each residue with 150 Hz and 350 Hz RF saturation to the McConnell equations<sup>56-57</sup>. Fitting to a simple two-state model, the population of the unbound, monomeric  $\beta_2\text{m}$  was determined to be 94  $\pm$  2% with an apparent first-order rate constant for the conversion of  $\beta_2\text{m}$  from unbound to collagen I-bound conformation ( $k_{\text{on}}^{\text{app}}$ ) of 6.4  $\pm$  0.8  $\text{s}^{-1}$ . We interpret the direct binding interface to be the residues with the highest  $R_2^{\text{bound}}$ . The  $^{15}\text{N}$ - $R_2^{\text{bound}}$  profile shows a similar trend to the  $\Delta\Theta$  profile (Figure 3A, C), and suggests that binding interfaces for collagen I on  $\beta_2\text{m}$  occur on both  $\beta$ -sheets. Examples of fitting to the experimental values of residues V82 (in a binding region) and K41 (away from interface) are shown in Figure 3D.

#### Collagen I induced conformational exchange in $\beta_2\text{m}$ revealed by $^{15}\text{N}$ relaxation.

The enhanced  $^{15}\text{N}$ - $R_2$  of  $\beta_2\text{m}$  may not only be due to binding with a high molecular weight species (such as in a large complex), but also to an increase in conformational exchange dynamics of  $\beta_2\text{m}$  on the  $\mu\text{s}$ – $\text{ms}$  timescale, since the  $^{15}\text{N}$ - $\Delta R_2$  is dependent on the magnetic field (Figure S2). In order to determine which residues in  $\beta_2\text{m}$  are in conformational exchange in the presence of collagen I, we use  $^{15}\text{N}$  in-phase Hahn echo experiments ( $R_2^{\text{HE}}$ ) to estimate the relaxation exchange rates. At pH 7.4 and 10°C, few residues in  $\beta_2\text{m}$  have  $R_{\text{ex}}$  values greater than 10  $\text{s}^{-1}$  in the absence of collagen I as measured by the in-phase Hahn echo experiments (Figure 4A). The N-terminus and residues in the BC and DE loops (for which several signals are unobservable) are natively in conformational exchange (Figure 4A). Upon addition of 0.6

mg/ml collagen I, the regions with high  $R_{ex}$  are expanded to include the full N-terminal  $\beta$ -strand A, part of  $\beta$ -strand B to part of  $\beta$ -strand C, including the connecting BC loop,  $\beta$ -strand D, the DE loop, the C-terminal end of  $\beta$ -strand F into the FG loop, and the C-terminal  $\beta$ -strand G (Figure 4B). Conformational dynamics in specific regions of  $\beta_2m$ , including the N-terminal region and the BC loop that contains *cis* Pro32, have been shown to be crucial in controlling the amyloidogenicity of the protein<sup>49,58</sup>. Thus, the enhanced conformational exchange induced by the presence of collagen I may facilitate minor populations of amyloid-component states of  $\beta_2m$ .

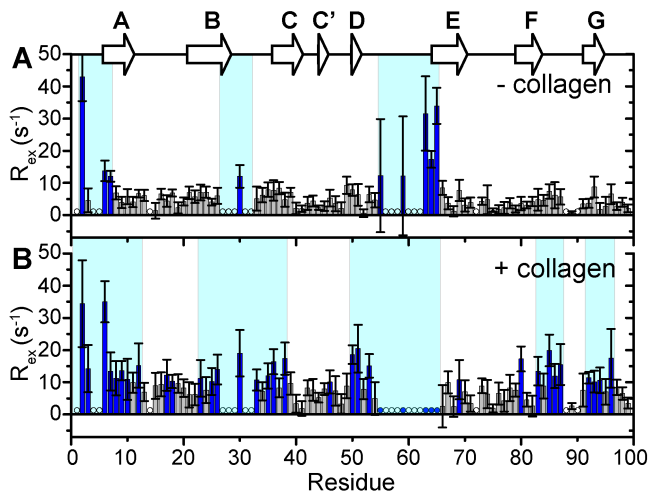

**Figure 4. Conformational exchange in  $\beta_2m$  induced by collagen I.** Relaxation exchange rates ( $R_{ex}$ ) obtained by  $^{15}N$ - $R_2$  Hahn echo experiments for each residue in  $300 \mu M$   $^{15}N$ - $\beta_2m$  in the absence (A) or presence (B) of  $0.6$  mg/ml collagen I at pH 7.4,  $10^\circ C$ ,  $700$  MHz  $^1H$  Larmor frequency.  $R_{ex}$  values over  $10 s^{-1}$  are indicated in blue bars. Regions shaded in cyan in both panels contain several residues with  $R_{ex} > 10 s^{-1}$  in the respective conditions. Residues with unobservable cross-peaks are indicated by open circles. Residues that were observable in the absence of collagen I but were reduced to the level of the noise in the presence of collagen I are indicated by filled blue circles. Error bars are propagated from fitting errors.

## DISCUSSION

### A novel collagen I binding surface on $\beta_2m$ .

Amyloid formation of  $\beta_2m$  at physiological pH *in vitro* requires assistance by co-factors<sup>21, 25-26, 28-29, 31-49</sup>. In particular, ECM molecules, such as collagens and GAGs have been targeted as amyloid-inducing co-factors, since  $\beta_2m$  amyloid formation has been localized to musculoskeletal tissues<sup>16, 22-24</sup>. While previous experiments have focused on the kinetics of amyloid formation in the presence of these molecules<sup>21, 28-29, 31, 59</sup>, a detailed atomistic description of the interactions involved and how these may enhance  $\beta_2m$  conformational dynamics and amyloid formation had not been elucidated. Here, we have used complementary NMR relaxation-based experiments to pinpoint residues of  $\beta_2m$  involved in the collagen I binding interface and collagen I-induced dynamics that lead to enhanced  $\beta_2m$  amyloid formation at neutral pH *in vitro*. The  $^{15}N$ -DEST experiments indicate that residues in  $\beta$ -strands A, B, C, D, E, F, and G form interaction surfaces with collagen I. These provide two surfaces of mixed hydrophilic and hydrophobic composition (Fig. S3). Both contain hydrophobic patches with the ABED  $\beta$ -sheet displaying several aromatic residues on the interaction surface (Fig. S3). Since both  $\beta$ -sheets on opposite sides of the molecule were determined to interact with the collagen I surface, binding must be multimodal involving interaction surfaces formed by K6, Q8, Y10, F22, N24, Y26, S52, Y63, L65, Y67, and E69 on the ABED  $\beta$ -sheet and E36, D38, L40, A79, R81, N83, I92, and K94 on the GFC  $\beta$ -sheet (Figure 3, S3). Comparison of the molecular dimensions of the interacting molecules ( $4 \times 2 \times 2$  nm for  $\beta_2m$ ,  $300$  nm  $\times$   $1.5$  nm for a collagen I triple helix, and microns in length  $\times$  up to  $500$  nm in diameter for mature collagen I fibrils) highlights the potential for a myriad of binding modes, enabling independent binding of several  $\beta_2m$  molecules to the same collagen molecule (Figure 5A–B). Importantly, the collagen I triple helix surface is interspersed with numerous hydrophilic and hydrophobic residues along its length (Figure 5A). The collagen I fibril surface maintains this repeating pattern of surface chemistries (Figure 5B), enhancing the potential for multiple binding modes to complementary surfaces in  $\beta_2m$  (Figure 5C).

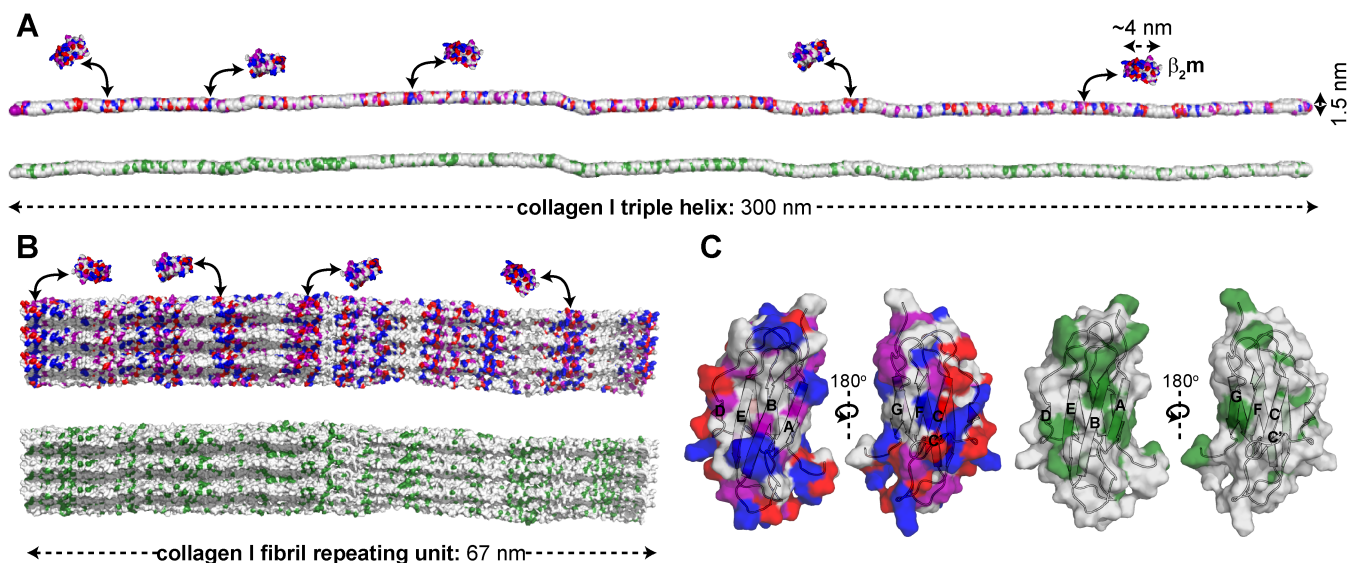

**Figure 5. Potential surface contacts for  $\beta_2m$ -collagen I interaction.** A) Surface model of the collagen I monomer (PDB: 3HKS<sup>60</sup>) color-coded by amino acid type (top: hydrophilic, bottom: hydrophobic). A surface representation of  $\beta_2m$  is shown for size comparison (PDB: 2XKS<sup>49</sup>). As an example, electrostatic surfaces of  $\beta_2m$  are shown weakly interacting with electrostatic surfaces of collagen I. (B) Surface models of the collagen I fibril repeating unit (built from PDB: 3HKS<sup>60</sup>), color-coded by amino acid type (top: hydrophilic, bottom: hydrophobic). The repeating unit is ~67 nm in length, however mature fibrils can be microns long and ~500 nm in diameter. Distinct bands of electrostatic residues are observed within the repeating unit. (C) Surface representation of  $\beta_2m$  monomer (PDB: 2XKS<sup>49</sup>) color-coded by amino acid type (left: hydrophilic, right: hydrophobic). All models are color-coded as: red, acidic; blue, basic; purple, uncharged-polar; and green, hydrophobic.

Collagen I is known to interact with multiple immunoglobulin-like protein folds through binding interfaces that include both hydrophobic and hydrophilic residues. Interactions of collagen I with osteoclast-associated receptor (OSCAR), leukocyte-associated immunoglobulin-like receptor-1 (LAIR-1), and glycoprotein VI (GPVI), play functional roles in immune system regulation<sup>61-64</sup> and platelet activation<sup>65-67</sup>. Similar to the  $\beta$ -sheet binding interface on  $\beta_2m$  for collagen I identified here, the collagen I binding sites on OSCAR and LAIR-1 are also found in  $\beta$ -sheet regions<sup>68-69</sup>. In the case of the OSCAR-collagen I interactions, Tyr and Arg residues that line the interacting  $\beta$ -sheet of OSCAR have been suggested to play a primary role<sup>68</sup>. LAIR-1 binds primarily to collagen fragments rich in Gly, Pro and hydroxyproline (GPO) content, but also has been shown to interact with multiple binding motifs in collagen II and III toolkit peptides, some of which are not GPO rich<sup>69</sup>. NMR and mutagenesis studies on LAIR-1 have shown that depletion of Arg or Glu at the putative  $\beta$ -sheet interface showed decreased collagen binding, suggesting a role for electrostatic interactions<sup>70</sup>. GPVI, also recognizes GPO rich collagen motifs, however through a unique hydrophobic groove formed by a  $\beta$ -strand connecting loop that is flanked by hydrophilic residues<sup>71-75</sup>. Thus, although these proteins all share a similar immunoglobulin fold, each shows a unique binding interface to collagen, interacting in grooves formed by  $\beta$ -sheets or loops and having both hydrophobic and hydrophilic residues that each play fundamental roles in binding.

#### Collagen-induced conformational dynamics in $\beta_2m$ reflect amyloid prone dynamics.

Beyond the structured collagen I-binding interface of  $\beta_2m$ , using <sup>15</sup>N relaxation experiments, we observe enhanced dynamics in the N- and C- termini, BC and FG loops, and the  $\beta$ -strand D of  $\beta_2m$  upon complex formation. Enhanced dynamics in each of these regions has been proposed to play key roles in the aggregation mechanism of wild-type  $\beta_2m$ <sup>38, 49-51, 74-84</sup>. Amyloid formation of  $\beta_2m$  is nucleation dependent and proceeds through a near native folding intermediate,  $I_T$ , that is in part defined by a non-native *trans*-His31-Pro32 peptide bond in the BC loop<sup>38, 50-51, 85-86</sup>. The *cis-trans* isomerization of Pro32 is aided by displacement of the N-terminal six residues, which destabilizes the BC loop, allowing  $\beta_2m$  to sample multiple amyloidogenic conformations that enhance the rate of aggregation<sup>38, 50-51, 74, 79-81, 85-86</sup>. Deletion of the first six N-terminal residues in the naturally occurring variant,  $\Delta N6$ , enhances the propensity for amyloid formation, and aggregation occurs in the absence of additional cofactors at physiological pH *in vitro*<sup>49, 74, 87-88</sup>. In addition, NMR relaxation experiments show enhanced dynamics in  $\beta$ -strand D and the DE loop of amyloidogenic  $\Delta N6$ <sup>49</sup>, which have been proposed to contribute to its higher aggregation propensity. NMR studies of a P32G- $\beta_2m$  variant, which inherently has a *trans*-His31-Gly32 peptide bond, showed significant line broadening in  $\beta$ -strands A and D and the BC and FG loops relative to WT- $\beta_2m$ <sup>38</sup>. This was interpreted to result from conformational conversion between the native and  $I_T$  conformations<sup>38</sup>. The observation of increased  $R_{ex}$  of these same regions upon addition of collagen I to WT- $\beta_2m$ , in this study, is consistent with the same regions undergoing conformational exchange from the native state to an amyloidogenic precursor consistent with the  $I_T$  state, to enhance amyloid formation. Such a model provides a mechanism to enhance *cis-trans* Pro isomerization to initiate assembly into amyloid without the involvement of a prolyl isomerase.

#### A proposed mechanism of collagen I-driven $\beta_2m$ amyloidogenesis.

With the new insights into the binding interface of collagen I on  $\beta_2m$  and its impact on  $\beta_2m$  dynamics described here, we propose a mechanistic view of how collagen I drives amyloidogenesis of  $\beta_2m$ . In the presence of collagen I, the  $\beta$ -sheets of  $\beta_2m$  are available for binding to the collagen I surface, with both  $\beta$ -sheets providing potential binding interfaces, indicative of multiple binding modes, rather than a unique and specific binding interface. The interaction between the two molecules is mediated by hydrophobic and electrostatic interactions (Figures 3, S3). In its native state, high transverse relaxation rates are observed in the apical loops of  $\beta_2m$ , including the BC loop that contains *cis* Pro32 and the adjacent DE loop (Figure 2B). Additional dynamics upon collagen I binding are imposed on the N-terminus,  $\beta$ -strands B and C, BC loop,  $\beta$ -strand D, FG loop, and the C-terminal  $\beta$ -strand G (Figure 4B). Through modification of the dynamics of  $\beta_2m$  in these sites, the probability of *cis-trans* isomerization of Pro32, known to be a key step in  $\beta_2m$  fibril formation<sup>85-86</sup>, will be increased, with concomitant sampling of amyloid-competent species, including the  $I_T$  state, known to promote amyloid formation<sup>38,50-51</sup> (Figure 6). The results provide a molecular explanation for the mechanism of deposition of  $\beta_2m$  in collagenous-rich joints in dialysis patients<sup>16,21-24</sup>. More generally, they also serve as an exemplar of the key role of the physiological environment in amyloid formation, by rationalizing the often remarkably specific deposition of amyloid to different tissues<sup>1</sup>, and in some cases, of different variants of the same protein in different tissues<sup>89-90</sup>. The methods used here to interrogate the weak-transient interaction of the large,  $\beta_2m$ -collagen I complex can be extended to future studies to gain atomic-level insight into how other physiologically relevant cofactors promote amyloid formation of globular proteins involved in other amyloid diseases.

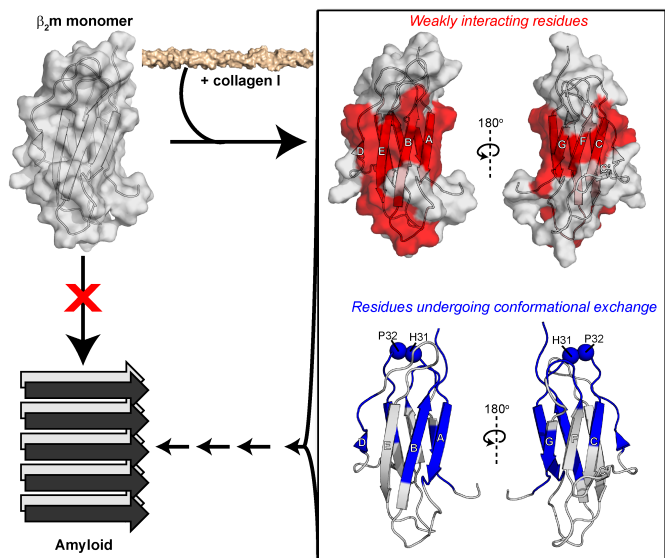

**Figure 6. Proposed mechanism for collagen-driven  $\beta_2m$  amyloidogenesis.** Alone, the  $\beta_2m$  monomer (PDB: 2XKS<sup>49</sup>) does not readily aggregate into amyloid fibrils. Upon addition of collagen I, we have observed an interaction interface to include both  $\beta$ -sheets of  $\beta_2m$  through the <sup>15</sup>N-DEST experiment (red). Collagen also induces conformational exchange in regions colored in blue, as assessed by <sup>15</sup>N relaxation experiments. The interaction of collagen I with the structured regions of  $\beta_2m$  enhances conformational exchange, promoting formation of an amyloid-competent species and inducing aggregation.

## MATERIALS AND METHODS

### Expression and purification of $\beta_2m$ .

Wild-type  $\beta_2m$  was expressed recombinantly in *Escherichia coli* BL21(DE3) pLysS cells by induction with 1 mM IPTG overnight at 37°C, following methods described previously<sup>39</sup>. Cells were lysed in 25 mM Tris-HCl buffer, pH 8.0 and with an Avestin Emulsiflex-C5 homogenizer.  $\beta_2m$  is accumulated in inclusion bodies. To extract the  $\beta_2m$  from inclusion bodies, the cell pellet was washed five times with 25 mM Tris-HCl buffer, pH 8.0 and solubilized in 25 mM Tris-HCl, pH 8.0 buffer containing 8 M urea, rocking overnight at room temperature. The protein was verified to be in the soluble fraction by SDS-PAGE.  $\beta_2m$  was refolded by dialyzing against 25 mM Tris-HCl buffer, pH 8.0 at 4°C and purifying by anion exchange (HiTrap Q HP, GE Healthcare). The protein was further purified by size exclusion chromatography with a Superdex 75 gel filtration column (GE Life Sciences). Protein purity was verified by SDS-PAGE, and concentrations for experiments were determined by measuring the absorbance at 280 nm using a molar extinction coefficient of 19,060 M<sup>-1</sup>cm<sup>-1</sup>. [U-<sup>15</sup>N]-enriched  $\beta_2m$  was expressed recombinantly for NMR using the same protocol in HCDM1 minimal media supplemented with <sup>15</sup>N-ammonium chloride.

### ELISA.

Relative adhesion of variable concentrations of  $\beta_2m$  to collagen I was determined by ELISA experiments. Nunc Maxisorp 96-well plates (Thermo Scientific) were coated with 100  $\mu$ l of collagen I from rat tail tendon (BD Biosciences; 10  $\mu$ g/ml in 10 mM acetic acid) overnight at 4°C. Uncoated areas on the plates were blocked with 200  $\mu$ l of 0.5% w/v casein in binding buffer at room temperature for 1 hr. The binding and washing buffer consisted of PBS at pH 7.4 with 0.05% v/v Tween 20 (PBS-T) and 0.05% w/v casein as a non-specific blocking agent. After washing the wells three times with 200  $\mu$ l washing buffer, 100  $\mu$ l  $\beta_2m$  in PBS-T and 0.05% w/v casein (10  $\mu$ g/ml, 40  $\mu$ g/ml, or 80

$\mu\text{g/ml}$ ) was added to the wells and incubated for 1 hr at room temperature. After three washes with 200  $\mu\text{l}$  washing buffer, 100  $\mu\text{l}$  mouse anti- $\beta_2\text{m}$  monoclonal antibody (1:2000 v/v in PBS-T and 0.05% w/v casein, Millipore Sigma) was bound to  $\beta_2\text{m}$  in each well by incubating at room temperature for 1 hr. Subsequently, following three washes with 200  $\mu\text{l}$  washing buffer, 100  $\mu\text{l}$  of goat HRP-conjugated anti-mouse secondary antibody (1:5000 v/v dilution in PBS-T and 0.05% w/v casein, Genscript) was incubated in the wells at room temperature for 30 min. After washing for a final four times with 200  $\mu\text{l}$  washing buffer, the binding of  $\beta_2\text{m}$  to collagen I was detected through a colorimetric assay using a 3,3',5,5'-tetramethylbenzidine substrate kit (Pierce) according to the manufacturer's protocol, and measuring the absorbance at 450 nm using a Tecan Infinite F50 plate reader with Magellan software.

#### ThT fluorescence.

Amyloid fibril formation was monitored by ThT fluorescence assays of  $\beta_2\text{m}$  in the presence or absence of collagen I fibrils. Purified recombinant  $\beta_2\text{m}$  lyophilized powder was dissolved in 100  $\mu\text{l}$  of 10 mM sodium phosphate buffer, pH 7.4 to 1 mg/ml (85  $\mu\text{M}$ ). Collagen I fibrils were prepared by incubating 3.4 mg/ml collagen I (BD Biosciences) in PBS, pH 7.4 at 37°C for 1 hr. The fibril suspension was sonicated in a bath sonicator for 10 min and centrifuged at 16,500 rpm for 10 min to isolate fibrils. Collagen fibril pellets were resuspended in 100  $\mu\text{l}$  of 10 mM sodium phosphate buffer, pH 7.4 in the presence or absence of  $\beta_2\text{m}$ . Three or four samples were prepared for each condition and were transferred to a 96-well plate. ThT was added to each sample to a final concentration of 10  $\mu\text{M}$ . ThT fluorescence was monitored over 22 days at 37°C with shaking at 600 rpm in a POLARstar Omega fluorimeter (BMG Labtech).

#### NMR.

For all NMR experiments, purified recombinant [ $^{15}\text{N}$ ]-labeled  $\beta_2\text{m}$  was diluted to 300  $\mu\text{M}$  in TBS, pH 7.4 with 0.5 mg/ml casein and 10% v/v  $\text{D}_2\text{O}$ . Before mixing, collagen I from rat tail tendon was dialyzed against TBS, pH 7.4. The concentration of collagen I after dialysis was determined by bicinchoninic acid assay (Pierce). All experiments were performed at 10°C. All data were collected on a 700 MHz Bruker AVIII or 900 MHz AVI NMR spectrometers equipped with TCI-cryo-probes. Data were processed in NMRPipe<sup>91</sup> and analyzed in Sparky<sup>92</sup>.

#### $^1\text{H}$ - $^{15}\text{N}$ HSQC spectra

$^1\text{H}$ - $^{15}\text{N}$  HSQC spectra<sup>93-94</sup> of [ $^{15}\text{N}$ ]-labeled  $\beta_2\text{m}$  were acquired with different concentrations of collagen I (0, 0.12 mg/ml, and 1.2 mg/ml) in TBS, pH 7.4 with 0.5 mg/ml casein and 10%  $\text{D}_2\text{O}$  at 10°C. The intensity ratio is taken as the intensity of a given cross-peak in the  $^1\text{H}$ - $^{15}\text{N}$  HSQC spectrum of  $\beta_2\text{m}$  in the presence of collagen I relative to the intensity of the same cross-peak in the absence of collagen I, determined in Sparky<sup>92</sup>. The errors were propagated from the signal to noise ratio in each spectra.

#### $^{15}\text{N}$ - $R_2$ and $^{15}\text{N}$ - $R_2^{\text{HE}}$

[ $^{15}\text{N}$ ]-labeled  $\beta_2\text{m}$   $^{15}\text{N}$  transverse relaxation rates ( $R_2$ ) were measured from a series of HSQC-based 2D  $^1\text{H}$ - $^{15}\text{N}$  spectra using the Carr-Purcell-Meiboom-Gill (CPMG) pulse sequence<sup>95</sup> with varying relaxation delays: in the absence of collagen I at 700 MHz- 0, 16, 16, 32, 48, 64, 64, 80, 96, and 112 ms and 900 MHz- 0, 16, 32, 32, 32, 48, 64, 80, 96, 112, and 128 ms and in the presence of 1.2 mg/ml collagen I at 700 MHz- 0, 16, 16, 32, 48, 48, 64, and 80 ms and at 900 MHz- 0, 16, 32, 32, 32, 48, 64, 80, and 96 ms. Relaxation delays used to quantify  $^{15}\text{N}$ - $R_2$  rates of  $\beta_2\text{m}$  in the presence of 0.6 mg/ml collagen I at 700 MHz were: 0, 8, 8, 16, 24, 32, and 56 ms and in the absence of collagen I: 0, 8, 8, 16, 24, 40, and 56 ms.  $^{15}\text{N}$ - $R_2^{\text{HE}}$  informs on the chemical exchange contribution to  $R_2$  by using an in-phase Hahn echo experiment<sup>96</sup>. Relaxation delays used in the  $R_2^{\text{HE}}$  experiment both in the presence and absence of 0.6 mg/ml collagen I were: 0.768, 7.68, 7.68, 15.4, 23, 38.5, and 61.4 ms. In each case, the  $R_2$  rates were determined by fitting peak intensities to a single exponential decay function. The chemical exchange contribution ( $R_{\text{ex}}$ ) for each  $\beta_2\text{m}$  residue in the absence and presence of 0.6 mg/ml collagen I was determined as:  $R_{\text{ex}} = R_2^{\text{HE}} - R_2$ .

#### DEST experiments

The  $^{15}\text{N}$ -DEST experiment<sup>56-57</sup> was applied to [ $^{15}\text{N}$ ]-labeled  $\beta_2\text{m}$  in the presence or absence of 0.6 mg/ml collagen I. In this experiment, an  $^{15}\text{N}$  saturation pulse of 150 or 350 Hz was applied for 0.9 ms at different  $^{15}\text{N}$  frequency offsets: 0,  $\pm 1$ ,  $\pm 2$ ,  $\pm 4$ ,  $\pm 8$ ,  $\pm 14$ ,  $\pm 21$ , and  $\pm 30$  kHz. An experiment in which the  $^{15}\text{N}$  saturation pulse was set to 0 Hz with an offset of 30 kHz was also included as a reference. The  $^{15}\text{N}$ -DEST profiles were extracted for each residue as the peak intensity at each  $^{15}\text{N}$  saturation offset and were fitted to a two-state model using the destfit program by Clore and co-workers to obtain  $R_2^{\text{bound}}$ ,  $p_{\text{bound}}$ , and  $k_{\text{on}}^{\text{app}}$ <sup>56-57</sup>. The  $\Delta\Theta$  profile was obtained by measuring  $\Theta$  for each  $\beta_2\text{m}$  residue in the presence and absence of 0.6 mg/ml collagen I as:  $\Theta = \frac{(I_{30\text{kHz}+I-30\text{kHz}}) - (I_{4\text{kHz}+I-4\text{kHz}})}{(I_{30\text{kHz}+I-30\text{kHz}})}$ , and taking  $\Delta\Theta = \Theta_{+\text{col}} - \Theta_{-\text{col}}$ .

## ASSOCIATED CONTENT

### Supporting Information

The Supporting Information includes figures that show an overlay of  $^1\text{H}$ - $^{15}\text{N}$  HSQC spectra of [ $^{15}\text{N}$ ]- $\beta_2\text{m}$  in the presence of 0 mg/ml, 0.12 mg/ml, or 1.2 mg/ml collagen I (Figure S1);  $^{15}\text{N}$ - $R_2$  measurements of [ $^{15}\text{N}$ ]- $\beta_2\text{m}$  in the absence or presence of collagen I at 700 MHz or 900 MHz (Figure S2); and a model showing the amino acid composition of the interacting  $\beta_2\text{m}$   $\beta$ -sheets (Figure S3). (PDF)

## AUTHOR INFORMATION

### Corresponding Author

\*Jean Baum, [jean.baum@rutgers.edu](mailto:jean.baum@rutgers.edu) or Sheena E. Radford, [s.e.radford@leeds.ac.uk](mailto:s.e.radford@leeds.ac.uk)

### Notes

The authors declare no competing financial interests.



## Funding Sources

This work was supported by American Heart Association Postdoctoral Fellowship 17POST33410326 to CLH and NIH grant GM45302 to JB. Additional support was provided by the Wellcome Trust (204963 and 092896) and the European Research Council (ERC) under European Union's Seventh Framework Programme (FP7/2007-2013) ERC grant agreement no. 322408 to SER. Some of the work presented here was conducted at the Center on Macromolecular Dynamics by NMR Spectroscopy located at the New York Structural Biology Center, supported by a grant from the NIH NIGMS (P41 GM118302) and ORIP/NIH facility improvement grant CO6RR015495. The 900 MHz NMR spectrometers were purchased with funds from NIH grant P41 GM066354, the Keck Foundation, New York State Assembly, and U.S. Dept. of Defense.

## ACKNOWLEDGMENT

We acknowledge Arthur Palmer for helpful discussions. We also acknowledge with thanks the many discussions with our group members. We thank Ana Monica Nunes for contributions in the beginning of this project and Nuria Benseny-Cases, who provided critical insights in the early stages of the work.

## ABBREVIATIONS

$\beta_2m$ ,  $\beta_2$ -microglobulin; DRA, Dialysis Related Amyloidosis; ECM, extracellular matrix; MHC-I, major histocompatibility complex-I; GAG-glycosaminoglycan; NMR, nuclear magnetic resonance; ELISA, enzyme-linked immunosorbent assay; ThT, thioflavin T; AFM, atomic force microscopy; HSQC, heteronuclear single quantum correlation; DEST, dark-state exchange saturation transfer; OSCAR, osteoclast associated receptor; LAIR-1, leukocyte associated immunoglobulin-like receptor-1; GPVI, glycoprotein VI; CPMG, Carr-Purcell-Meiboom-Gill.

## REFERENCES

1. Chiti, F.; Dobson, C. M., Protein misfolding, functional amyloid, and human disease. *Annu Rev Biochem* 2006, 75, 333-66.
2. Pham, C. L.; Kwan, A. H.; Sunde, M., Functional amyloid: widespread in Nature, diverse in purpose. *Essays Biochem* 2014, 56, 207-19.
3. Fowler, D. M.; Koulov, A. V.; Balch, W. E.; Kelly, J. W., Functional amyloid – from bacteria to humans. *Trends in Biochemical Sciences* 2007, 32 (5), 217-224.
4. Iadanza, M. G.; Jackson, M. P.; Hewitt, E. W.; Ranson, N. A.; Radford, S. E., A new era for understanding amyloid structures and disease. *Nat Rev Mol Cell Biol* 2018, 19 (12), 755-773.
5. Knowles, T. P.; Vendruscolo, M.; Dobson, C. M., The amyloid state and its association with protein misfolding diseases. *Nat Rev Mol Cell Biol* 2014, 15 (6), 384-96.
6. Chiti, F.; Dobson, C. M., Protein Misfolding, Amyloid Formation, and Human Disease: A Summary of Progress Over the Last Decade. *Annu Rev Biochem* 2017, 86, 27-68.
7. Eisenberg, D. S.; Sawaya, M. R., Structural Studies of Amyloid Proteins at the Molecular Level. *Annu Rev Biochem* 2017, 86, 69-95.
8. Nizynski, B.; Dzwolak, W.; Nieznanski, K., Amyloidogenesis of Tau protein. *Protein Sci* 2017, 26 (11), 2126-2150.
9. Korsak, M.; Kozyreva, T., Beta Amyloid Hallmarks: From Intrinsically Disordered Proteins to Alzheimer's Disease. *Adv Exp Med Biol* 2015, 870, 401-21.
10. Darling, A. L.; Uversky, V. N., Intrinsic Disorder in Proteins with Pathogenic Repeat Expansions. *Molecules* 2017, 22 (12).
11. Iannuzzi, C.; Maritato, R.; Irace, G.; Sirangelo, I., Misfolding and amyloid aggregation of apomyoglobin. *Int J Mol Sci* 2013, 14 (7), 14287-300.
12. Chiti, F.; Dobson, C. M., Amyloid formation by globular proteins under native conditions. *Nat Chem Biol* 2009, 5 (1), 15-22.
13. Iadanza, M. G.; Silvers, R.; Boardman, J.; Smith, H. I.; Karamanos, T. K.; Debelouchina, G. T.; Su, Y.; Griffin, R. G.; Ranson, N. A.; Radford, S. E., The structure of a beta2-microglobulin fibril suggests a molecular basis for its amyloid polymorphism. *Nat Commun* 2018, 9 (1), 4517.
14. Dember, L. M.; Jaber, B. L., Dialysis-related amyloidosis: late finding or hidden epidemic? *Semin Dial* 2006, 19 (2), 105-9.
15. Dzido, G.; Sprague, S. M., Dialysis-related amyloidosis. *Minerva Urol Nefrol* 2003, 55 (2), 121-9.
16. Gejyo, F.; Yamada, T.; Odani, S.; Nakagawa, Y.; Arakawa, M.; Kunitomo, T.; Kataoka, H.; Suzuki, M.; Hirasawa, Y.; Shirahama, T.; et al., A new form of amyloid protein associated with chronic hemodialysis was identified as beta 2-microglobulin. *Biochem Biophys Res Commun* 1985, 129 (3), 701-6.
17. Muñoz-Gómez, J.; Bergadá-Barado, E.; Gómez-Pérez, R.; Llopart-Buisán, E.; Subías-Sobrevía, E.; Rotés-Querol, J.; Solé-Arqués, M., Amyloid arthropathy in patients undergoing periodical haemodialysis for chronic renal failure: a new complication. *Annals of the Rheumatic Diseases* 1985, 44 (11), 729-733.
18. Becker, J. W.; Reeke, G. N., Jr., Three-dimensional structure of beta 2-microglobulin. *Proc Natl Acad Sci U S A* 1985, 82 (12), 4225-9.
19. Floege, J.; Bartsch, A.; Schulze, M.; Shaldon, S.; Koch, K. M.; Smeby, L. C., Clearance and synthesis rates of beta 2-microglobulin in patients undergoing hemodialysis and in normal subjects. *J Lab Clin Med* 1991, 118 (2), 153-65.
20. Homma, N.; Gejyo, F.; Isemura, M.; Arakawa, M., Collagen-binding affinity of beta-2-microglobulin, a preprotein of hemodialysis-associated amyloidosis. *Nephron* 1989, 53 (1), 37-40.
21. Relini, A.; Canale, C.; De Stefano, S.; Rolandi, R.; Giorgetti, S.; Stoppini, M.; Rossi, A.; Fogolari, F.; Corazza, A.; Esposito, G.; Gliozzi, A.; Bellotti, V., Collagen plays an active role in the aggregation of beta2-microglobulin under physiopathological conditions of dialysis-related amyloidosis. *J Biol Chem* 2006, 281 (24), 16521-9.
22. Hadjipavlou, A.; Lander, P.; Begin, L.; Bercovitch, D.; Davidman, M.; Jakab, E., Skeletal amyloidosis due to beta microglobulinemia in a patient on hemodialysis. A case report. *J Bone Joint Surg Am* 1988, 70 (1), 119-21.
23. Bardin, T.; Kuntz, D.; Zingraff, J.; Voisin, M.-C.; Zelmar, A.; Lansman, J., Synovial amyloidosis in patients undergoing long-term hemodialysis. *Arthritis & Rheumatism* 1985, 28 (9), 1052-1058.
24. Gejyo, F.; Odani, S.; Yamada, T.; Honma, N.; Saito, H.; Suzuki, Y.; Nakagawa, Y.; Kobayashi, H.; Maruyama, Y.; Hirasawa, Y.; et al., Beta 2-microglobulin: a new form of amyloid protein associated with chronic hemodialysis. *Kidney Int* 1986, 30 (3), 385-90.
25. Eakin, C. M.; Miranker, A. D., From chance to frequent encounters: origins of beta2-microglobulin fibrillogenesis. *Biochim Biophys Acta* 2005, 1753 (1), 92-9.
26. Platt, G. W.; Radford, S. E., Glimpses of the molecular mechanisms of beta2-microglobulin fibril formation in vitro: aggregation on a complex energy landscape. *FEBS Lett* 2009, 583 (16), 2623-9.
27. Moe, S. M.; Chen, N. X., The role of the synovium and cartilage in the pathogenesis of beta(2)-microglobulin amyloidosis. *Semin Dial* 2001, 14 (2), 127-30.

28. Relini, A.; De Stefano, S.; Torrassa, S.; Cavalleri, O.; Rolandi, R.; Gliozzi, A.; Giorgetti, S.; Raimondi, S.; Marchese, L.; Verga, L.; Rossi, A.; Stoppini, M.; Bellotti, V., Heparin strongly enhances the formation of beta2-microglobulin amyloid fibrils in the presence of type I collagen. *J Biol Chem* 2008, 283 (8), 4912-20.
29. Benseny-Cases, N.; Karamanos, T. K.; Hoop, C. L.; Baum, J.; Radford, S. E., Extracellular matrix components modulate different stages in beta2-microglobulin amyloid formation. *J Biol Chem* 2019, 294 (24), 9392-9401.
30. Giorgetti, S.; Rossi, A.; Mangione, P.; Raimondi, S.; Marini, S.; Stoppini, M.; Corazza, A.; Viglino, P.; Esposito, G.; Cetta, G.; Merlini, G.; Bellotti, V., Beta2-microglobulin isoforms display an heterogeneous affinity for type I collagen. *Protein Sci* 2005, 14 (3), 696-702.
31. Myers, S. L.; Jones, S.; Jahn, T. R.; Morten, I. J.; Tennent, G. A.; Hewitt, E. W.; Radford, S. E., A systematic study of the effect of physiological factors on beta2-microglobulin amyloid formation at neutral pH. *Biochemistry* 2006, 45 (7), 2311-21.
32. Yamamoto, S.; Yamaguchi, I.; Hasegawa, K.; Tsutsumi, S.; Goto, Y.; Gejyo, F.; Naiki, H., Glycosaminoglycans enhance the trifluoroethanol-induced extension of beta 2-microglobulin-related amyloid fibrils at a neutral pH. *J Am Soc Nephrol* 2004, 15 (1), 126-33.
33. Srikanth, R.; Mendoza, V. L.; Bridgewater, J. D.; Zhang, G.; Vachet, R. W., Copper binding to beta-2-microglobulin and its pre-amyloid oligomers. *Biochemistry* 2009, 48 (41), 9871-81.
34. Antwi, K.; Mahar, M.; Srikanth, R.; Olbris, M. R.; Tyson, J. F.; Vachet, R. W., Cu(II) organizes beta-2-microglobulin oligomers but is released upon amyloid formation. *Protein Sci* 2008, 17 (4), 748-59.
35. Calabrese, M. F.; Miranker, A. D., Metal binding sheds light on mechanisms of amyloid assembly. *Prion* 2009, 3 (1), 1-4.
36. Calabrese, M. F.; Eakin, C. M.; Wang, J. M.; Miranker, A. D., A regulatable switch mediates self-association in an immunoglobulin fold. *Nat Struct Mol Biol* 2008, 15 (9), 965-71.
37. Calabrese, M. F.; Miranker, A. D., Formation of a stable oligomer of beta-2 microglobulin requires only transient encounter with Cu(II). *J Mol Biol* 2007, 367 (1), 1-7.
38. Jahn, T. R.; Parker, M. J.; Homans, S. W.; Radford, S. E., Amyloid formation under physiological conditions proceeds via a native-like folding intermediate. *Nat Struct Mol Biol* 2006, 13 (3), 195-201.
39. McParland, V. J.; Kad, N. M.; Kalverda, A. P.; Brown, A.; Kirwin-Jones, P.; Hunter, M. G.; Sunde, M.; Radford, S. E., Partially unfolded states of beta(2)-microglobulin and amyloid formation in vitro. *Biochemistry* 2000, 39 (30), 8735-46.
40. Morgan, C. J.; Gelfand, M.; Atreya, C.; Miranker, A. D., Kidney dialysis-associated amyloidosis: a molecular role for copper in fiber formation. *J Mol Biol* 2001, 309 (2), 339-45.
41. Yamamoto, S.; Hasegawa, K.; Yamaguchi, I.; Tsutsumi, S.; Kardos, J.; Goto, Y.; Gejyo, F.; Naiki, H., Low concentrations of sodium dodecyl sulfate induce the extension of beta 2-microglobulin-related amyloid fibrils at a neutral pH. *Biochemistry* 2004, 43 (34), 11075-82.
42. Borysik, A. J.; Morten, I. J.; Radford, S. E.; Hewitt, E. W., Specific glycosaminoglycans promote unseeded amyloid formation from beta2-microglobulin under physiological conditions. *Kidney Int* 2007, 72 (2), 174-81.
43. Gosal, W. S.; Morten, I. J.; Hewitt, E. W.; Smith, D. A.; Thomson, N. H.; Radford, S. E., Competing pathways determine fibril morphology in the self-assembly of beta2-microglobulin into amyloid. *J Mol Biol* 2005, 351 (4), 850-64.
44. Ricagno, S.; Colombo, M.; de Rosa, M.; Sangiovanni, E.; Giorgetti, S.; Raimondi, S.; Bellotti, V.; Bolognesi, M., DE loop mutations affect beta2-microglobulin stability and amyloid aggregation. *Biochem Biophys Res Commun* 2008, 377 (1), 146-50.
45. Santambrogio, C.; Ricagno, S.; Colombo, M.; Barbiroli, A.; Bonomi, F.; Bellotti, V.; Bolognesi, M.; Grandori, R., DE-loop mutations affect beta2-microglobulin stability, oligomerization, and the low-pH unfolded form. *Protein Sci* 2010, 19 (7), 1386-94.
46. Halabelian, L.; Relini, A.; Barbiroli, A.; Penco, A.; Bolognesi, M.; Ricagno, S., A covalent homodimer probing early oligomers along amyloid aggregation. *Sci Rep* 2015, 5, 14651.
47. Leney, A. C.; Pashley, C. L.; Scarff, C. A.; Radford, S. E.; Ashcroft, A. E., Insights into the role of the beta-2 microglobulin D-strand in amyloid propensity revealed by mass spectrometry. *Mol Biosyst* 2014, 10 (3), 412-20.
48. Narang, D.; Singh, A.; Swasthi, H. M.; Mukhopadhyay, S., Characterization of Salt-Induced Oligomerization of Human beta2-Microglobulin at Low pH. *J Phys Chem B* 2016, 120 (32), 7815-23.
49. Eichner, T.; Kalverda, A. P.; Thompson, G. S.; Homans, S. W.; Radford, S. E., Conformational conversion during amyloid formation at atomic resolution. *Mol Cell* 2011, 41 (2), 161-72.
50. Kameda, A.; Hoshino, M.; Higurashi, T.; Takahashi, S.; Naiki, H.; Goto, Y., Nuclear magnetic resonance characterization of the refolding intermediate of beta2-microglobulin trapped by non-native prolyl peptide bond. *J Mol Biol* 2005, 348 (2), 383-97.
51. Sakata, M.; Chatani, E.; Kameda, A.; Sakurai, K.; Naiki, H.; Goto, Y., Kinetic coupling of folding and prolyl isomerization of beta2-microglobulin studied by mutational analysis. *J Mol Biol* 2008, 382 (5), 1242-55.
52. Janowska, M. K.; Wu, K. P.; Baum, J., Unveiling transient protein-protein interactions that modulate inhibition of alpha-synuclein aggregation by beta-synuclein, a pre-synaptic protein that co-localizes with alpha-synuclein. *Sci Rep* 2015, 5, 15164.
53. Wu, K. P.; Baum, J., Detection of transient interchain interactions in the intrinsically disordered protein alpha-synuclein by NMR paramagnetic relaxation enhancement. *J Am Chem Soc* 2010, 132 (16), 5546-7.
54. Lian, L. Y., NMR studies of weak protein-protein interactions. *Prog Nucl Magn Reson Spectrosc* 2013, 71, 59-72.
55. Vinogradova, O.; Qin, J., NMR as a unique tool in assessment and complex determination of weak protein-protein interactions. *Top Curr Chem* 2012, 326, 35-45.
56. Fawzi, N. L.; Ying, J.; Ghirlando, R.; Torchia, D. A.; Clore, G. M., Atomic-resolution dynamics on the surface of amyloid-beta protofibrils probed by solution NMR. *Nature* 2011, 480 (7376), 268-72.
57. Fawzi, N. L.; Ying, J.; Torchia, D. A.; Clore, G. M., Probing exchange kinetics and atomic resolution dynamics in high-molecular-weight complexes using dark-state exchange saturation transfer NMR spectroscopy. *Nat Protoc* 2012, 7 (8), 1523-33.
58. Karamanos, T. K.; Kalverda, A. P.; Thompson, G. S.; Radford, S. E., Visualization of transient protein-protein interactions that promote or inhibit amyloid assembly. *Mol Cell* 2014, 55 (2), 214-26.
59. Jahn, T. R.; Tennent, G. A.; Radford, S. E., A common beta-sheet architecture underlies in vitro and in vivo beta2-microglobulin amyloid fibrils. *J Biol Chem* 2008, 283 (25), 17279-86.
60. Orgel, J. P.; Irving, T. C.; Miller, A.; Wess, T. J., Microfibrillar structure of type I collagen in situ. *Proc Natl Acad Sci U S A* 2006, 103 (24), 9001-5.
61. Merck, E.; Gaillard, C.; Gorman, D. M.; Montero-Julian, F.; Durand, I.; Zurawski, S. M.; Menetrier-Caux, C.; Carra, G.; Lebecque, S.; Trinchieri, G.; Bates, E. E., OSCAR is an FcRgamma-associated receptor that is expressed by myeloid cells and is involved in antigen presentation and activation of human dendritic cells. *Blood* 2004, 104 (5), 1386-95.

62. Kim, N.; Takami, M.; Rho, J.; Josien, R.; Choi, Y., A novel member of the leukocyte receptor complex regulates osteoclast differentiation. *J Exp Med* 2002, 195 (2), 201-9.
63. Meyaard, L.; Hurenkamp, J.; Clevers, H.; Lanier, L. L.; Phillips, J. H., Leukocyte-associated Ig-like receptor-1 functions as an inhibitory receptor on cytotoxic T cells. *J Immunol* 1999, 162 (10), 5800-4.
64. Poggi, A.; Tomasello, E.; Ferrero, E.; Zocchi, M. R.; Moretta, L., p40/LAIR-1 regulates the differentiation of peripheral blood precursors to dendritic cells induced by granulocyte-monocyte colony-stimulating factor. *Eur J Immunol* 1998, 28 (7), 2086-91.
65. Ruggeri, Z. M., Platelets in atherothrombosis. *Nat Med* 2002, 8 (11), 1227-34.
66. Moroi, M.; Jung, S. M., Platelet glycoprotein VI: its structure and function. *Thromb Res* 2004, 114 (4), 221-33.
67. Kahn, M. L., Platelet-collagen responses: molecular basis and therapeutic promise. *Semin Thromb Hemost* 2004, 30 (4), 419-25.
68. Zhou, L.; Hinerman, J. M.; Blaszczyk, M.; Miller, J. L.; Conrady, D. G.; Barrow, A. D.; Chirgadze, D. Y.; Bihan, D.; Farndale, R. W.; Herr, A. B., Structural basis for collagen recognition by the immune receptor OSCAR. *Blood* 2016, 127 (5), 529-37.
69. Lebbink, R. J.; Raynal, N.; de Ruiter, T.; Bihan, D. G.; Farndale, R. W.; Meyaard, L., Identification of multiple potent binding sites for human leukocyte associated Ig-like receptor LAIR on collagens II and III. *Matrix Biol* 2009, 28 (4), 202-10.
70. Brondijk, T. H.; de Ruiter, T.; Ballering, J.; Wienk, H.; Lebbink, R. J.; van Ingen, H.; Boelens, R.; Farndale, R. W.; Meyaard, L.; Huizinga, E. G., Crystal structure and collagen-binding site of immune inhibitory receptor LAIR-1: unexpected implications for collagen binding by platelet receptor GPVI. *Blood* 2010, 115 (7), 1364-73.
71. Smethurst, P. A.; Joutsu-Korhonen, L.; O'Connor, M. N.; Wilson, E.; Jennings, N. S.; Garner, S. F.; Zhang, Y.; Knight, C. G.; Dafforn, T. R.; Buckle, A.; MJ, I. J.; De Groot, P. G.; Watkins, N. A.; Farndale, R. W.; Ouwehand, W. H., Identification of the primary collagen-binding surface on human glycoprotein VI by site-directed mutagenesis and by a blocking phage antibody. *Blood* 2004, 103 (3), 903-11.
72. Horii, K.; Kahn, M. L.; Herr, A. B., Structural basis for platelet collagen responses by the immune-type receptor glycoprotein VI. *Blood* 2006, 108 (3), 936-42.
73. O'Connor, M. N.; Smethurst, P. A.; Farndale, R. W.; Ouwehand, W. H., Gain- and loss-of-function mutants confirm the importance of apical residues to the primary interaction of human glycoprotein VI with collagen. *J Thromb Haemost* 2006, 4 (4), 869-73.
74. Eichner, T.; Radford, S. E., Understanding the complex mechanisms of beta2-microglobulin amyloid assembly. *FEBS J* 2011, 278 (20), 3868-83.
75. Verdone, G.; Corazza, A.; Viglino, P.; Pettirossi, F.; Giorgetti, S.; Mangione, P.; Andreola, A.; Stoppini, M.; Bellotti, V.; Esposito, G., The solution structure of human beta2-microglobulin reveals the prodromes of its amyloid transition. *Protein Sci* 2002, 11 (3), 487-99.
76. Ricagno, S.; Raimondi, S.; Giorgetti, S.; Bellotti, V.; Bolognesi, M., Human beta-2 microglobulin W60V mutant structure: Implications for stability and amyloid aggregation. *Biochem Biophys Res Commun* 2009, 380 (3), 543-7.
77. Esposito, G.; Corazza, A.; Viglino, P.; Verdone, G.; Pettirossi, F.; Fogolari, F.; Makek, A.; Giorgetti, S.; Mangione, P.; Stoppini, M.; Bellotti, V., Solution structure of beta(2)-microglobulin and insights into fibrillogenesis. *Biochim Biophys Acta* 2005, 1753 (1), 76-84.
78. Trinh, C. H.; Smith, D. P.; Kalverda, A. P.; Phillips, S. E.; Radford, S. E., Crystal structure of monomeric human beta-2-microglobulin reveals clues to its amyloidogenic properties. *Proc Natl Acad Sci U S A* 2002, 99 (15), 9771-6.
79. Hodkinson, J. P.; Jahn, T. R.; Radford, S. E.; Ashcroft, A. E., HDX-ESI-MS reveals enhanced conformational dynamics of the amyloidogenic protein beta(2)-microglobulin upon release from the MHC-1. *J Am Soc Mass Spectrom* 2009, 20 (2), 278-86.
80. Rennella, E.; Corazza, A.; Fogolari, F.; Viglino, P.; Giorgetti, S.; Stoppini, M.; Bellotti, V.; Esposito, G., Equilibrium unfolding thermodynamics of beta2-microglobulin analyzed through native-state H/D exchange. *Biophys J* 2009, 96 (1), 169-79.
81. Rennella, E.; Corazza, A.; Giorgetti, S.; Fogolari, F.; Porcari, R.; Verga, L.; Stoppini, M.; Bellotti, V.; Esposito, G., Folding and fibrillogenesis: clues from beta2-microglobulin. *J Mol Biol* 2010, 401 (2), 286-97.
82. Armen, R. S.; Daggett, V., Characterization of two distinct beta2-microglobulin unfolding intermediates that may lead to amyloid fibrils of different morphology. *Biochemistry* 2005, 44 (49), 16098-107.
83. Fogolari, F.; Corazza, A.; Viglino, P.; Zuccato, P.; Pieri, L.; Faccioli, P.; Bellotti, V.; Esposito, G., Molecular dynamics simulation suggests possible interaction patterns at early steps of beta2-microglobulin aggregation. *Biophys J* 2007, 92 (5), 1673-81.
84. Corazza, A.; Rennella, E.; Schanda, P.; Mimmi, M. C.; Cutili, T.; Raimondi, S.; Giorgetti, S.; Fogolari, F.; Viglino, P.; Frydman, L.; Gal, M.; Bellotti, V.; Brutscher, B.; Esposito, G., Native-unlike long-lived intermediates along the folding pathway of the amyloidogenic protein beta2-microglobulin revealed by real-time two-dimensional NMR. *J Biol Chem* 2010, 285 (8), 5827-35.
85. Chiti, F.; De Lorenzi, E.; Grossi, S.; Mangione, P.; Giorgetti, S.; Caccialanza, G.; Dobson, C. M.; Merlini, G.; Ramponi, G.; Bellotti, V., A partially structured species of beta 2-microglobulin is significantly populated under physiological conditions and involved in fibrillogenesis. *J Biol Chem* 2001, 276 (50), 46714-21.
86. Chiti, F.; Mangione, P.; Andreola, A.; Giorgetti, S.; Stefani, M.; Dobson, C. M.; Bellotti, V.; Taddei, N., Detection of two partially structured species in the folding process of the amyloidogenic protein beta 2-microglobulin. *J Mol Biol* 2001, 307 (1), 379-91.
87. Esposito, G.; Michelutti, R.; Verdone, G.; Viglino, P.; Hernandez, H.; Robinson, C. V.; Amoresano, A.; Dal Piaz, F.; Monti, M.; Pucci, P.; Mangione, P.; Stoppini, M.; Merlini, G.; Ferri, G.; Bellotti, V., Removal of the N-terminal hexapeptide from human beta2-microglobulin facilitates protein aggregation and fibril formation. *Protein Sci* 2000, 9 (5), 831-45.
88. Monti, M.; Amoresano, A.; Giorgetti, S.; Bellotti, V.; Pucci, P., Limited proteolysis in the investigation of beta2-microglobulin amyloidogenic and fibrillar states. *Biochim Biophys Acta* 2005, 1753 (1), 44-50.
89. Mangione, P. P.; Esposito, G.; Relini, A.; Raimondi, S.; Porcari, R.; Giorgetti, S.; Corazza, A.; Fogolari, F.; Penco, A.; Goto, Y.; Lee, Y. H.; Yagi, H.; Cecconi, C.; Naqvi, M. M.; Gillmore, J. D.; Hawkins, P. N.; Chiti, F.; Rolandi, R.; Taylor, G. W.; Pepys, M. B.; Stoppini, M.; Bellotti, V., Structure, folding dynamics, and amyloidogenesis of D76N beta2-microglobulin: roles of shear flow, hydrophobic surfaces, and alpha-crystallin. *J Biol Chem* 2013, 288 (43), 30917-30.
90. Johnson, S. M.; Connelly, S.; Fearn, C.; Powers, E. T.; Kelly, J. W., The transthyretin amyloidoses: from delineating the molecular mechanism of aggregation linked to pathology to a regulatory-agency-approved drug. *J Mol Biol* 2012, 421 (2-3), 185-203.
91. Delaglio, F.; Grzesiek, S.; Vuister, G. W.; Zhu, G.; Pfeifer, J.; Bax, A., NMRPipe: a multidimensional spectral processing system based on UNIX pipes. *J Biomol NMR* 1995, 6 (3), 277-93.
92. Goddard, T. D.; Kneller, D. G. SPARKY 3, University of California, San Francisco, 2008.
93. Palmer, A. G.; Cavanagh, J.; Wright, P. E.; Rance, M., Sensitivity improvement in proton-detected two-dimensional heteronuclear correlation NMR spectroscopy. *Journal of Magnetic Resonance (1969)* 1991, 93 (1), 151-170.
94. Kay, L.; Keifer, P.; Saarinen, T., Pure absorption gradient enhanced heteronuclear single quantum correlation spectroscopy with improved sensitivity. *Journal of the American Chemical Society* 1992, 114 (26), 10663-10665.

95. Hansen, D. F.; Vallurupalli, P.; Kay, L. E., An improved  $^{15}\text{N}$  relaxation dispersion experiment for the measurement of millisecond time-scale dynamics in proteins. *J Phys Chem B* 2008, 112 (19), 5898-904.
96. Millet, O.; Loria, J. P.; Kroenke, C. D.; Pons, M.; Palmer, A. G., The static magnetic field dependence of chemical exchange linebroadening defines the NMR chemical shift time scale. *Journal of the American Chemical Society* 2000, 122 (12), 2867-2877.
